# Supplementary material
Source: PubMed Central journal article supplement (PMC2568854)
Supplement: 10.3163.1536-5050.96.4.016.sg002.pdf [file 10.3163.1536-5050.96.4.016.sg002.pdf]

## Information-seeking behavior of medical residents in clinical practice in Bahia, Brazil

Martha Silvia Martinez-Silveira, MLS; Nanci Oddone, PhD

---

**Table 1**  
Information sources most frequently used in the past 30 days by Professor Edgar Santos University  
Hospital (HUPES) residents

---

| <b>Sources used</b>             | <b>n</b> | <b>%</b> |
|---------------------------------|----------|----------|
| Preceptor or supervising doctor | 67       | 92       |
| Private collection              | 60       | 82       |
| Internet search engines         | 37       | 51       |
| Databases                       | 33       | 45       |
| Health websites                 | 24       | 33       |
| Library or librarian            | 15       | 21       |

---
