# Supplementary material
Source: PubMed Central journal article supplement (PMC2568854)
Supplement: 10.3163.1536-5050.96.4.016.sg003.pdf [file 10.3163.1536-5050.96.4.016.sg003.pdf]

## Information-seeking behavior of medical residents in clinical practice in Bahia, Brazil

Martha Silvia Martinez-Silveira, MLS; Nanci Oddone, PhD

---

**Table 2**  
Reasons motivating residents' information searches within the past 30 days and encountered barriers

---

| <b>Search justification</b>  | <b>n</b> | <b>%</b> | <b>Search barriers</b>                         | <b>n</b> | <b>%</b> |
|------------------------------|----------|----------|------------------------------------------------|----------|----------|
| Doubts or vacillation        | 53       | 73       | Lack of time                                   | 36       | 42       |
| Rare medical case            | 52       | 71       | Libraries not available                        | 27       | 37       |
| Need to present the case     | 49       | 67       | Difficulties in locating documents             | 14       | 19       |
| Special interest in the case | 48       | 66       | Cost of documents                              | 11       | 15       |
| Patient questions            | 27       | 27       | Linguistic obstacles                           | 9        | 12       |
| Fear of medical mistakes     | 24       | 33       | Lack of skills in the use electronic resources | 6        | 8        |

---
