# Supplementary material
Source: PubMed Central journal article supplement (PMC2568854)
Supplement: 10.3163.1536-5050.96.4.016.sg004.pdf [file 10.3163.1536-5050.96.4.016.sg004.pdf]

**Information-seeking behavior of medical residents in clinical practice in Bahia, Brazil**

**Martha Silvia Martinez-Silveira, MLS; Nanci Oddone, PhD**

**Table 3**  
Information sources preferred by residents of Professor Edgar Santos University Hospital (HUPES)  
(Bahia-Brazil)

| Resources                | Ranking |    |     |    |     |    |     |    |     |    |     |    |
|--------------------------|---------|----|-----|----|-----|----|-----|----|-----|----|-----|----|
|                          | 1st     |    | 2nd |    | 3rd |    | 4th |    | 5th |    | 6th |    |
|                          | n       | %  | n   | %  | n   | %  | n   | %  | n   | %  | n   | %  |
| Private collection       | 33      | 45 | 13  | 18 | 7   | 9  | 3   | 4  | 2   | 3  | 1   | 1  |
| Preceptor                | 19      | 26 | 24  | 33 | 9   | 12 | 7   | 9  | 5   | 7  | 2   | 3  |
| Bibliographic databases  | 5       | 7  | 8   | 11 | 14  | 19 | 9   | 12 | 10  | 14 | 2   | 3  |
| Internet search engines  | 6       | 8  | 5   | 7  | 12  | 16 | 13  | 18 | 3   | 4  | 4   | 6  |
| Health care professional | 0       | —  | 1   | 1  | 3   | 4  | 13  | 18 | 11  | 15 | 7   | 9  |
| Libraries or librarians  | 1       | 1  | 6   | 8  | 5   | 7  | 5   | 7  | 6   | 8  | 12  | 16 |
