# Supplementary material
Source: PubMed Central journal article supplement (PMC2568854)
Supplement: 10.3163.1536-5050.96.4.016.sg005.pdf [file 10.3163.1536-5050.96.4.016.sg005.pdf]

**Information-seeking behavior of medical residents in clinical practice in Bahia, Brazil**

**Martha Silvia Martinez-Silveira, MLS; Nanci Oddone, PhD**

**Table 4**

Composition of the private collections of residents of the Professor Edgar Santos University Hospital (HUPES) (Bahia-Brazil)

| Number of items | <u>Books</u> |     | <u>Scientific CD-ROMs</u> |    | <u>Scientific videos</u> |    | <u>Conference proceedings</u> |    |
|-----------------|--------------|-----|---------------------------|----|--------------------------|----|-------------------------------|----|
|                 | n            | %   | n                         | %  | n                        | %  | n                             | %  |
| Between 1–10    | 28           | 38  | 47                        | 64 | 14                       | 19 | 38                            | 52 |
| Between 11–20   | 28           | 38  | 2                         | 3  | 0                        | —  | 3                             | 4  |
| More than 21    | 17           | 22  | 4                         | 6  | 0                        | —  | 3                             | 4  |
| Not specified   | 0            | —   | 4                         | 6  | 7                        | 10 | 5                             | 7  |
| Total           | 73           | 100 | 57                        | 78 | 21                       | 29 | 49                            | 67 |

| Number of subscriptions | <u>Brazilian medical journals subscriptions</u> |    | <u>Brazilian electronic medical journals subscriptions</u> |    |
|-------------------------|-------------------------------------------------|----|------------------------------------------------------------|----|
|                         | n                                               | %  | n                                                          | %  |
| One                     | 12                                              | 16 | 7                                                          | 10 |
| Two                     | 2                                               | 3  | 2                                                          | 3  |
| Not specified           | 1                                               | 1  | 2                                                          | 3  |
| Total                   | 15                                              | 21 | 11                                                         | 15 |

| Amounts           | <u>Foreign medical journals subscriptions</u> |   | <u>Foreign electronic medical journals subscriptions</u> |    |
|-------------------|-----------------------------------------------|---|----------------------------------------------------------|----|
|                   | n                                             | % | n                                                        | %  |
| 1 Subscription    | 3                                             | 4 | 4                                                        | 6  |
| 2 Subscriptions   | 1                                             | 1 | 3                                                        | 4  |
| 3 + subscriptions | 0                                             | 0 | 3                                                        | 4  |
| Not specified     | 2                                             | 3 | 2                                                        | 3  |
| Total             | 6                                             | 8 | 12                                                       | 16 |

Access to a computer and the Internet at home: n=69, 95%
