# Supplementary material
Source: PubMed Central journal article supplement (PMC2568854)
Supplement: 10.3163.1536-5050.96.4.016.sg006.pdf [file 10.3163.1536-5050.96.4.016.sg006.pdf]

## Information-seeking behavior of medical residents in clinical practice in Bahia, Brazil

Martha Silvia Martinez-Silveira, MLS; Nanci Oddone, PhD

---

**Table 5**  
Self-assessment of search results obtained by residents

---

| <b>Results assessment</b>                                                   | <b>n</b> | <b>%</b> |
|-----------------------------------------------------------------------------|----------|----------|
| Fulfilled their information need, despite a large number of results         | 25       | 38       |
| Recognized the need to learn more about search strategies                   | 23       | 35       |
| Affirmed that most references do not apply to their question                | 17       | 26       |
| Retrieved a reasonable number of references (less than 100)                 | 16       | 24       |
| Obtained full success in quickly finding what they needed                   | 7        | 11       |
| Did not know if research was exhaustive and did not have time to broaden it | 5        | 8        |
| Never found what they needed                                                | 0        | —        |

---
