# Supplementary material
Source: PubMed Central journal article supplement (PMC2568854)

## Information-seeking behavior of medical residents in clinical practice in Bahia, Brazil

Martha Silvia Martinez-Silveira, MLS; Nanci Oddone, PhD

**Figure 1**  
Medical literature preferred by residents of the Professor Edgar Santos University Hospital (HUPES)  
(Bahia-Brazil)

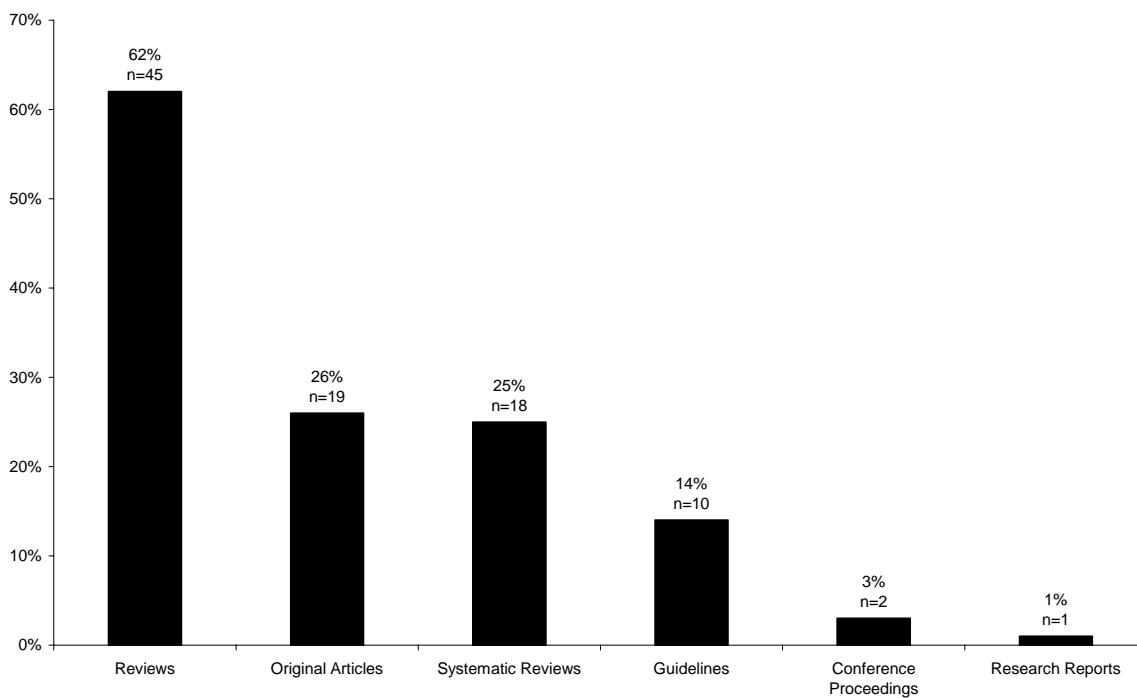

Supplement: 10.3163.1536-5050.96.4.016.sg007.pdf [file 10.3163.1536-5050.96.4.016.sg007.pdf]
